# Supplementary material
Source: publisher figshare collection journal article supplement (https://acs.figshare.com/ndownloader/files/21809886)
Supplement: Supplementary file 1 [file 21809886]

Compound;Smiles
1;N[C@H](CC1=CC=CC=C1)C(N2[C@H](C(NCC3=CC(N)=NC(N)=C3)=O)CCC2)=O
2;N[C@H](CC1=CC=CC=C1)C(N2[C@H](C(NCC3=CC=NC(N)=C3)=O)CCC2)=O
3;N[C@H](CC1=CC=CC=C1)C(N2[C@H](C(NCC3=CC=C(N)N=C3)=O)CCC2)=O
4;N[C@H](C(C1=CC=CC=C1)C2=CC=CC=C2)C(N3[C@H](C(NCC4=CC=NC=C4)=O)CCC3)=O
19;N[C@H](CC1=CC=CC=C1)C(N2[C@H](C(NCC3=CC=C(C(N)=N)C=C3)=O)CCC2)=O
